# Supplementary material
Source: PubMed Central journal article supplement (PMC8463630)

Supporting Information for  
 “Inverse Probability Weighted Estimators of Vaccine Effects  
 Accommodating Partial Interference and Censoring”

by

Sujatro Chakladar, Samuel P. Rosin, Michael G. Hudgens\*,  
 M. Elizabeth Halloran, John D. Clemens, Mohammad Ali,  
 Michael E. Emch

\* Email: mhudgens@bios.unc.edu

## Web Appendix A. Proposition Proof

From the definition of the IPCW estimator,

$$E\{\hat{F}_i(t, a, \alpha)\} = E\left\{\sum_{j=1}^{n_i} \frac{\pi(\mathbf{A}_{i,-j}; \alpha) I(A_{ij} = a) I(\Delta_{ij} = 1) I(X_{ij} \leq t)}{S_C(X_{ij} | \mathbf{L}_i, \mathbf{A}_i) \Pr(\mathbf{A}_i | \mathbf{L}_i) n_i}\right\} \quad (1)$$

Noting  $\Delta_{ij} = 1$  if and only if  $C_{ij} > T_{ij}(\mathbf{A}_i)$ , by the law of total expectation and causal consistency the right side of (1) can be expressed as

$$E_{\mathbf{L}_i, \mathbf{A}_i, T_{ij}(\mathbf{A}_i)} E_{C_{ij} | \mathbf{L}_i, \mathbf{A}_i, T_{ij}(\mathbf{A}_i)} \left[ \sum_{j=1}^{n_i} \frac{\pi(\mathbf{A}_{i,-j}; \alpha) I(A_{ij} = a) I\{C_{ij} > T_{ij}(\mathbf{A}_i)\} I\{T_{ij}(\mathbf{A}_i) \leq t\}}{S_C\{T_{ij}(\mathbf{A}_i) | \mathbf{L}_i, \mathbf{A}_i\} \Pr(\mathbf{A}_i | \mathbf{L}_i) n_i} \right]$$

Moving the inner expectation inside the summation and taking out terms that are constant with respect to that expectation, it follows that  $E\{\hat{F}_i(t, a, \alpha)\}$  equals

$$E_{\mathbf{L}_i, \mathbf{A}_i, T_{ij}(\mathbf{A}_i)} \left[ \sum_{j=1}^{n_i} \frac{\pi(\mathbf{A}_{i,-j}; \alpha) I(A_{ij} = a) E\{I(C_{ij} > T_{ij}(\mathbf{A}_i)) | \mathbf{L}_i, \mathbf{A}_i, T_{ij}(\mathbf{A}_i)\} I\{T_{ij}(\mathbf{A}_i) \leq t\}}{S_C\{T_{ij}(\mathbf{A}_i) | \mathbf{L}_i, \mathbf{A}_i\} \Pr(\mathbf{A}_i | \mathbf{L}_i) n_i} \right]$$

Note by Assumption III that for any  $t$

$$S_c(t | \mathbf{L}_i, \mathbf{A}_i) = \Pr\{C_{ij} > t | \mathbf{L}_i, \mathbf{A}_i, T_{ij}(\mathbf{A}_i) = t\} = E\{I(C_{ij} > t) | \mathbf{L}_i, \mathbf{A}_i, T_{ij}(\mathbf{A}_i) = t\}$$

Therefore

$$E\{\hat{F}_i(t, a, \alpha)\} = E_{\mathbf{A}_i, \mathbf{L}_i, T_{ij}(\mathbf{A}_i)} \left[ \frac{\sum_{j=1}^{n_i} \pi(\mathbf{A}_{i,-j}; \alpha) I(A_{ij} = a) I\{T_{ij}(\mathbf{A}_i) \leq t\}}{\Pr(\mathbf{A}_i | \mathbf{L}_i) n_i} \right].$$

The remainder of the proof follows from the proof of Theorem 6 of Tchetgen Tchetgen and VanderWeele (2012).

# Web Tables

**Web Table 1**

*Simulation results as in Table 1 of the main text, but with  $m = 400$  and  $n_i = 10$  for all  $i$ , where:  $\alpha$  denotes the allocation probability;  $\mu_a$  denotes the value of the target parameters  $\mu(100, a, \alpha)$  for  $a = 0, 1$ ; Bias is the average of  $\mu(100, a, \alpha) - \hat{\mu}(100, a, \alpha)$  for  $a = 0, 1$ ; ESE is the empirical standard error; MSE is the median of the sandwich variance-based standard error estimates; EC denotes the empirical coverage of the 95% Wald confidence intervals based on the Normal distribution; and  $EC_t$  denotes empirical coverage of  $t$ -distribution-based Wald confidence intervals.*

| $\alpha$ | $\mu_0$ | Bias  | ESE  | MSE  | EC  | $EC_t$ | $\alpha$ | $\mu_1$ | Bias | ESE  | MSE  | EC  | $EC_t$ |
|----------|---------|-------|------|------|-----|--------|----------|---------|------|------|------|-----|--------|
| 0.1      | 0.39    | -0.02 | 0.09 | 0.08 | 93% | 93%    | 0.1      | 0.28    | 0.00 | 0.09 | 0.08 | 91% | 91%    |
| 0.2      | 0.38    | -0.01 | 0.04 | 0.04 | 96% | 96%    | 0.2      | 0.28    | 0.00 | 0.05 | 0.05 | 94% | 94%    |
| 0.3      | 0.38    | 0.00  | 0.03 | 0.03 | 96% | 96%    | 0.3      | 0.27    | 0.00 | 0.03 | 0.03 | 94% | 94%    |
| 0.4      | 0.37    | 0.00  | 0.03 | 0.03 | 94% | 94%    | 0.4      | 0.27    | 0.00 | 0.02 | 0.02 | 94% | 94%    |
| 0.5      | 0.37    | 0.00  | 0.03 | 0.02 | 94% | 94%    | 0.5      | 0.27    | 0.00 | 0.02 | 0.02 | 94% | 94%    |
| 0.6      | 0.36    | 0.00  | 0.03 | 0.02 | 92% | 92%    | 0.6      | 0.27    | 0.00 | 0.02 | 0.02 | 95% | 95%    |
| 0.7      | 0.35    | 0.00  | 0.03 | 0.03 | 95% | 95%    | 0.7      | 0.26    | 0.00 | 0.02 | 0.02 | 94% | 94%    |
| 0.8      | 0.35    | 0.00  | 0.03 | 0.03 | 94% | 95%    | 0.8      | 0.26    | 0.00 | 0.02 | 0.02 | 95% | 95%    |
| 0.9      | 0.34    | 0.00  | 0.05 | 0.05 | 94% | 94%    | 0.9      | 0.26    | 0.00 | 0.02 | 0.02 | 95% | 95%    |

**Web Table 2**

*Simulation results as in Table 1 of the main text, but with  $m = 300$  and  $n_i = 10$  for all  $i$ .*

| $\alpha$ | $\mu_0$ | Bias  | ESE  | MSE  | EC  | $EC_t$ | $\alpha$ | $\mu_1$ | Bias  | ESE  | MSE  | EC  | $EC_t$ |
|----------|---------|-------|------|------|-----|--------|----------|---------|-------|------|------|-----|--------|
| 0.1      | 0.39    | -0.02 | 0.09 | 0.09 | 92% | 93%    | 0.1      | 0.28    | -0.01 | 0.11 | 0.09 | 89% | 89%    |
| 0.2      | 0.38    | -0.01 | 0.05 | 0.05 | 95% | 95%    | 0.2      | 0.28    | 0.00  | 0.06 | 0.05 | 93% | 93%    |
| 0.3      | 0.38    | -0.01 | 0.04 | 0.04 | 95% | 95%    | 0.3      | 0.27    | 0.00  | 0.04 | 0.04 | 93% | 93%    |
| 0.4      | 0.37    | 0.00  | 0.03 | 0.03 | 95% | 95%    | 0.4      | 0.27    | 0.00  | 0.03 | 0.03 | 94% | 94%    |
| 0.5      | 0.37    | 0.00  | 0.03 | 0.03 | 95% | 95%    | 0.5      | 0.27    | 0.00  | 0.02 | 0.02 | 95% | 95%    |
| 0.6      | 0.36    | 0.00  | 0.03 | 0.03 | 95% | 95%    | 0.6      | 0.26    | 0.00  | 0.02 | 0.02 | 95% | 95%    |
| 0.7      | 0.35    | 0.00  | 0.03 | 0.03 | 94% | 94%    | 0.7      | 0.26    | 0.00  | 0.02 | 0.02 | 94% | 94%    |
| 0.8      | 0.35    | 0.00  | 0.04 | 0.04 | 95% | 95%    | 0.8      | 0.26    | 0.00  | 0.02 | 0.02 | 96% | 96%    |
| 0.9      | 0.34    | 0.00  | 0.06 | 0.06 | 95% | 95%    | 0.9      | 0.26    | 0.00  | 0.03 | 0.03 | 95% | 95%    |

**Web Table 3**

*Simulation results as in Table 1 of the main text, but with  $m = 200$  and  $n_i = 10$  for all  $i$ .*

| $\alpha$ | $\mu_0$ | Bias  | ESE  | MSE  | EC  | $EC_t$ | $\alpha$ | $\mu_1$ | Bias  | ESE  | MSE  | EC  | $EC_t$ |
|----------|---------|-------|------|------|-----|--------|----------|---------|-------|------|------|-----|--------|
| 0.1      | 0.39    | -0.02 | 0.12 | 0.10 | 90% | 90%    | 0.1      | 0.39    | -0.02 | 0.12 | 0.10 | 90% | 90%    |
| 0.2      | 0.38    | -0.01 | 0.06 | 0.06 | 94% | 94%    | 0.2      | 0.38    | -0.01 | 0.06 | 0.06 | 94% | 94%    |
| 0.3      | 0.38    | -0.01 | 0.05 | 0.04 | 92% | 93%    | 0.3      | 0.38    | -0.01 | 0.05 | 0.04 | 92% | 93%    |
| 0.4      | 0.37    | 0.00  | 0.04 | 0.04 | 93% | 93%    | 0.4      | 0.37    | 0.00  | 0.04 | 0.04 | 93% | 93%    |
| 0.5      | 0.37    | 0.00  | 0.04 | 0.03 | 94% | 94%    | 0.5      | 0.37    | 0.00  | 0.04 | 0.03 | 94% | 94%    |
| 0.6      | 0.36    | 0.00  | 0.03 | 0.03 | 95% | 95%    | 0.6      | 0.36    | 0.00  | 0.03 | 0.03 | 95% | 95%    |
| 0.7      | 0.35    | 0.00  | 0.04 | 0.04 | 93% | 94%    | 0.7      | 0.35    | 0.00  | 0.04 | 0.04 | 93% | 94%    |
| 0.8      | 0.35    | 0.00  | 0.05 | 0.05 | 93% | 94%    | 0.8      | 0.35    | 0.00  | 0.05 | 0.05 | 93% | 94%    |
| 0.9      | 0.34    | 0.00  | 0.08 | 0.07 | 91% | 91%    | 0.9      | 0.34    | 0.00  | 0.08 | 0.07 | 91% | 91%    |

**Web Table 4**

*Simulation results as in Table 1 of the main text, but with  $m = 100$  and  $n_i = 10$  for all  $i$ .*

| $\alpha$ | $\mu_0$ | Bias  | ESE  | MSE  | EC  | $EC_t$ | $\alpha$ | $\mu_1$ | Bias  | ESE  | MSE  | EC  | $EC_t$ |
|----------|---------|-------|------|------|-----|--------|----------|---------|-------|------|------|-----|--------|
| 0.1      | 0.39    | -0.01 | 0.17 | 0.13 | 84% | 84%    | 0.1      | 0.39    | -0.01 | 0.17 | 0.13 | 84% | 84%    |
| 0.2      | 0.38    | -0.01 | 0.09 | 0.08 | 92% | 93%    | 0.2      | 0.38    | -0.01 | 0.09 | 0.08 | 92% | 93%    |
| 0.3      | 0.38    | -0.01 | 0.07 | 0.06 | 93% | 94%    | 0.3      | 0.38    | -0.01 | 0.07 | 0.06 | 93% | 94%    |
| 0.4      | 0.37    | 0.00  | 0.06 | 0.05 | 93% | 93%    | 0.4      | 0.37    | 0.00  | 0.06 | 0.05 | 93% | 93%    |
| 0.5      | 0.36    | 0.00  | 0.05 | 0.05 | 93% | 93%    | 0.5      | 0.36    | 0.00  | 0.05 | 0.05 | 93% | 93%    |
| 0.6      | 0.36    | 0.01  | 0.05 | 0.04 | 93% | 93%    | 0.6      | 0.36    | 0.01  | 0.05 | 0.04 | 93% | 93%    |
| 0.7      | 0.35    | 0.01  | 0.05 | 0.05 | 93% | 93%    | 0.7      | 0.35    | 0.01  | 0.05 | 0.05 | 93% | 93%    |
| 0.8      | 0.35    | 0.01  | 0.07 | 0.06 | 92% | 92%    | 0.8      | 0.35    | 0.01  | 0.07 | 0.06 | 92% | 92%    |
| 0.9      | 0.34    | 0.00  | 0.11 | 0.10 | 89% | 90%    | 0.9      | 0.34    | 0.00  | 0.11 | 0.10 | 89% | 90%    |

**Web Table 5**

*Simulation results as in Table 1 of the main text, but with  $m = 50$  and  $n_i = 10$  for all  $i$ .*

| $\alpha$ | $\mu_0$ | Bias  | ESE  | MSE  | EC  | $EC_t$ | $\alpha$ | $\mu_1$ | Bias  | ESE  | MSE  | EC  | $EC_t$ |
|----------|---------|-------|------|------|-----|--------|----------|---------|-------|------|------|-----|--------|
| 0.1      | 0.39    | -0.01 | 0.27 | 0.13 | 74% | 75%    | 0.1      | 0.28    | -0.01 | 0.27 | 0.12 | 68% | 68%    |
| 0.2      | 0.38    | -0.01 | 0.15 | 0.10 | 88% | 88%    | 0.2      | 0.28    | -0.01 | 0.15 | 0.11 | 82% | 83%    |
| 0.3      | 0.38    | -0.01 | 0.11 | 0.08 | 90% | 91%    | 0.3      | 0.28    | 0.00  | 0.10 | 0.08 | 88% | 89%    |
| 0.4      | 0.37    | 0.00  | 0.09 | 0.07 | 90% | 91%    | 0.4      | 0.27    | 0.00  | 0.08 | 0.06 | 90% | 90%    |
| 0.5      | 0.37    | 0.00  | 0.08 | 0.06 | 91% | 92%    | 0.5      | 0.27    | 0.00  | 0.06 | 0.05 | 91% | 92%    |
| 0.6      | 0.36    | 0.01  | 0.07 | 0.06 | 91% | 92%    | 0.6      | 0.27    | 0.00  | 0.05 | 0.04 | 91% | 91%    |
| 0.7      | 0.35    | 0.01  | 0.08 | 0.07 | 91% | 92%    | 0.7      | 0.26    | 0.00  | 0.05 | 0.04 | 90% | 90%    |
| 0.8      | 0.35    | 0.00  | 0.10 | 0.09 | 89% | 90%    | 0.8      | 0.26    | 0.00  | 0.05 | 0.05 | 90% | 91%    |
| 0.9      | 0.34    | 0.00  | 0.16 | 0.13 | 84% | 85%    | 0.9      | 0.26    | 0.00  | 0.07 | 0.06 | 89% | 90%    |

**Web Table 6**

*Simulation results as in Table 1 of the main text, but with  $m = 10$  and  $n_i = 10$  for all  $i$  (53 of the 1000 simulated data sets where the fitted mixed model estimated covariance matrices were singular are excluded).*

| $\alpha$ | $\mu_0$ | Bias  | ESE  | MSE  | EC  | EC <sub>t</sub> | $\alpha$ | $\mu_1$ | Bias  | ESE  | MSE  | EC  | EC <sub>t</sub> |
|----------|---------|-------|------|------|-----|-----------------|----------|---------|-------|------|------|-----|-----------------|
| 0.1      | 0.39    | 0.11  | 0.40 | 0.07 | 44% | 69%             | 0.1      | 0.28    | -0.01 | 0.67 | 0.02 | 34% | 53%             |
| 0.2      | 0.38    | 0.04  | 0.33 | 0.11 | 62% | 87%             | 0.2      | 0.28    | 0.00  | 0.43 | 0.08 | 48% | 75%             |
| 0.3      | 0.38    | 0.01  | 0.28 | 0.12 | 67% | 94%             | 0.3      | 0.28    | 0.01  | 0.28 | 0.09 | 57% | 88%             |
| 0.4      | 0.37    | 0.02  | 0.22 | 0.11 | 73% | 98%             | 0.4      | 0.27    | 0.02  | 0.19 | 0.08 | 67% | 96%             |
| 0.5      | 0.37    | 0.03  | 0.18 | 0.10 | 73% | 99%             | 0.5      | 0.27    | 0.02  | 0.15 | 0.08 | 70% | 98%             |
| 0.6      | 0.36    | 0.03  | 0.17 | 0.10 | 73% | 99%             | 0.6      | 0.27    | 0.02  | 0.13 | 0.07 | 72% | 99%             |
| 0.7      | 0.35    | 0.03  | 0.19 | 0.11 | 75% | 98%             | 0.7      | 0.26    | 0.01  | 0.13 | 0.07 | 75% | 100%            |
| 0.8      | 0.35    | 0.00  | 0.25 | 0.14 | 72% | 95%             | 0.8      | 0.26    | 0.01  | 0.14 | 0.08 | 74% | 99%             |
| 0.9      | 0.34    | -0.02 | 0.42 | 0.14 | 60% | 82%             | 0.9      | 0.26    | 0.02  | 0.17 | 0.08 | 67% | 94%             |

**Web Table 7**

*Simulation results as in Table 1 of the main text, but with  $m = 500$  and  $n_i = 30$  for all  $i$ .*

| $\alpha$ | $\mu_0$ | Bias  | ESE  | MSE  | EC  | $EC_t$ | $\alpha$ | $\mu_1$ | Bias | ESE  | MSE  | EC  | $EC_t$ |
|----------|---------|-------|------|------|-----|--------|----------|---------|------|------|------|-----|--------|
| 0.1      | 0.39    | -0.01 | 0.11 | 0.10 | 92% | 92%    | 0.1      | 0.28    | 0.00 | 0.10 | 0.09 | 89% | 89%    |
| 0.2      | 0.38    | -0.01 | 0.06 | 0.05 | 93% | 93%    | 0.2      | 0.28    | 0.00 | 0.06 | 0.05 | 92% | 92%    |
| 0.3      | 0.38    | 0.00  | 0.04 | 0.04 | 94% | 94%    | 0.3      | 0.27    | 0.00 | 0.04 | 0.03 | 93% | 93%    |
| 0.4      | 0.37    | 0.00  | 0.04 | 0.03 | 93% | 93%    | 0.4      | 0.27    | 0.00 | 0.03 | 0.03 | 93% | 94%    |
| 0.5      | 0.36    | 0.00  | 0.03 | 0.03 | 93% | 93%    | 0.5      | 0.27    | 0.00 | 0.02 | 0.02 | 94% | 94%    |
| 0.6      | 0.36    | 0.00  | 0.03 | 0.03 | 94% | 94%    | 0.6      | 0.26    | 0.00 | 0.02 | 0.02 | 94% | 94%    |
| 0.7      | 0.35    | 0.00  | 0.03 | 0.03 | 94% | 94%    | 0.7      | 0.26    | 0.00 | 0.02 | 0.02 | 93% | 93%    |
| 0.8      | 0.34    | 0.00  | 0.04 | 0.03 | 95% | 95%    | 0.8      | 0.26    | 0.00 | 0.02 | 0.02 | 95% | 95%    |
| 0.9      | 0.34    | -0.01 | 0.05 | 0.05 | 95% | 95%    | 0.9      | 0.25    | 0.00 | 0.02 | 0.02 | 96% | 96%    |



**Web Table 8**

*Simulation results as in Table 1 of the main text, but with  $m = 500$  and  $n_i = 50$  for all  $i$ .*

| $\alpha$ | $\mu_0$ | Bias  | ESE  | MSE  | EC  | $EC_t$ | $\alpha$ | $\mu_1$ | Bias  | ESE  | MSE  | EC  | $EC_t$ |
|----------|---------|-------|------|------|-----|--------|----------|---------|-------|------|------|-----|--------|
| 0.1      | 0.39    | -0.01 | 0.15 | 0.12 | 89% | 89%    | 0.1      | 0.28    | -0.01 | 0.14 | 0.10 | 86% | 86%    |
| 0.2      | 0.38    | 0.00  | 0.08 | 0.07 | 92% | 93%    | 0.2      | 0.28    | -0.01 | 0.07 | 0.06 | 92% | 92%    |
| 0.3      | 0.38    | 0.00  | 0.06 | 0.05 | 93% | 93%    | 0.3      | 0.27    | 0.00  | 0.05 | 0.04 | 92% | 92%    |
| 0.4      | 0.37    | 0.00  | 0.05 | 0.04 | 92% | 92%    | 0.4      | 0.27    | 0.00  | 0.04 | 0.03 | 91% | 91%    |
| 0.5      | 0.36    | 0.00  | 0.04 | 0.04 | 92% | 92%    | 0.5      | 0.27    | 0.00  | 0.03 | 0.03 | 92% | 92%    |
| 0.6      | 0.36    | 0.00  | 0.04 | 0.03 | 93% | 93%    | 0.6      | 0.26    | 0.00  | 0.03 | 0.02 | 91% | 91%    |
| 0.7      | 0.35    | 0.00  | 0.04 | 0.03 | 92% | 92%    | 0.7      | 0.26    | 0.00  | 0.03 | 0.02 | 93% | 93%    |
| 0.8      | 0.34    | 0.00  | 0.04 | 0.04 | 93% | 94%    | 0.8      | 0.26    | 0.00  | 0.03 | 0.02 | 93% | 93%    |
| 0.9      | 0.34    | 0.00  | 0.06 | 0.05 | 93% | 93%    | 0.9      | 0.25    | 0.00  | 0.03 | 0.03 | 94% | 94%    |

**Web Table 9**

*Simulation results as in Table 1 of the main text, but with  $m = 500$  and  $n_i = 75$  for all  $i$ .*

| $\alpha$ | $\mu_0$ | Bias  | ESE  | MSE  | EC  | $EC_t$ | $\alpha$ | $\mu_1$ | Bias  | ESE  | MSE  | EC  | $EC_t$ |
|----------|---------|-------|------|------|-----|--------|----------|---------|-------|------|------|-----|--------|
| 0.1      | 0.39    | -0.01 | 0.18 | 0.14 | 87% | 87%    | 0.1      | 0.28    | -0.01 | 0.15 | 0.11 | 84% | 84%    |
| 0.2      | 0.38    | 0.00  | 0.10 | 0.08 | 91% | 91%    | 0.2      | 0.28    | -0.01 | 0.08 | 0.07 | 91% | 91%    |
| 0.3      | 0.38    | 0.00  | 0.08 | 0.07 | 91% | 91%    | 0.3      | 0.27    | 0.00  | 0.07 | 0.05 | 89% | 89%    |
| 0.4      | 0.37    | 0.00  | 0.11 | 0.06 | 92% | 92%    | 0.4      | 0.27    | 0.00  | 0.08 | 0.04 | 90% | 90%    |
| 0.5      | 0.36    | 0.00  | 0.08 | 0.05 | 90% | 90%    | 0.5      | 0.27    | 0.00  | 0.06 | 0.04 | 90% | 90%    |
| 0.6      | 0.36    | 0.00  | 0.14 | 0.04 | 91% | 91%    | 0.6      | 0.26    | 0.00  | 0.10 | 0.03 | 90% | 90%    |
| 0.7      | 0.35    | 0.00  | 0.07 | 0.04 | 90% | 90%    | 0.7      | 0.26    | 0.00  | 0.05 | 0.03 | 91% | 91%    |
| 0.8      | 0.34    | 0.00  | 0.06 | 0.04 | 92% | 92%    | 0.8      | 0.26    | 0.00  | 0.04 | 0.03 | 92% | 92%    |
| 0.9      | 0.34    | 0.00  | 0.06 | 0.06 | 93% | 93%    | 0.9      | 0.25    | 0.00  | 0.04 | 0.04 | 94% | 94%    |

**Web Table 10**

*Simulation results as in Table 1 of main text, but with  $m = 500$  and  $n_i = 100$  for all  $i$ .*

| $\alpha$ | $\mu_0$ | Bias | ESE  | MSE  | EC  | $EC_t$ | $\alpha$ | $\mu_1$ | Bias | ESE  | MSE  | EC  | $EC_t$ |
|----------|---------|------|------|------|-----|--------|----------|---------|------|------|------|-----|--------|
| 0.1      | 0.39    | 0.01 | 0.21 | 0.14 | 80% | 80%    | 0.1      | 0.28    | 0.00 | 0.17 | 0.11 | 79% | 80%    |
| 0.2      | 0.38    | 0.00 | 0.13 | 0.10 | 86% | 87%    | 0.2      | 0.28    | 0.00 | 0.11 | 0.07 | 85% | 85%    |
| 0.3      | 0.38    | 0.00 | 0.12 | 0.08 | 88% | 88%    | 0.3      | 0.27    | 0.00 | 0.09 | 0.06 | 87% | 87%    |
| 0.4      | 0.37    | 0.00 | 0.12 | 0.07 | 87% | 88%    | 0.4      | 0.27    | 0.00 | 0.08 | 0.05 | 88% | 88%    |
| 0.5      | 0.36    | 0.01 | 0.08 | 0.06 | 88% | 88%    | 0.5      | 0.27    | 0.00 | 0.06 | 0.04 | 87% | 87%    |
| 0.6      | 0.36    | 0.01 | 0.07 | 0.05 | 86% | 86%    | 0.6      | 0.26    | 0.00 | 0.05 | 0.04 | 87% | 87%    |
| 0.7      | 0.35    | 0.00 | 0.07 | 0.05 | 89% | 89%    | 0.7      | 0.26    | 0.00 | 0.05 | 0.04 | 89% | 89%    |
| 0.8      | 0.34    | 0.00 | 0.07 | 0.05 | 91% | 91%    | 0.8      | 0.26    | 0.00 | 0.05 | 0.04 | 91% | 91%    |
| 0.9      | 0.34    | 0.00 | 0.07 | 0.06 | 92% | 92%    | 0.9      | 0.25    | 0.00 | 0.04 | 0.04 | 93% | 93%    |

**Web Table 11**

*Simulation results as in Table 1 of main text, but with  $m = 500$  and  $n_i = 200$  for all  $i$ .*

| $\alpha$ | $\mu_0$ | Bias  | ESE  | MSE  | EC  | $EC_t$ | $\alpha$ | $\mu_1$ | Bias  | ESE  | MSE  | EC  | $EC_t$ |
|----------|---------|-------|------|------|-----|--------|----------|---------|-------|------|------|-----|--------|
| 0.1      | 0.39    | -0.03 | 1.17 | 0.17 | 71% | 71%    | 0.1      | 0.28    | -0.01 | 0.50 | 0.12 | 71% | 71%    |
| 0.2      | 0.38    | 0.01  | 0.24 | 0.13 | 76% | 76%    | 0.2      | 0.28    | 0.01  | 0.19 | 0.09 | 75% | 75%    |
| 0.3      | 0.38    | 0.00  | 0.27 | 0.11 | 75% | 76%    | 0.3      | 0.27    | 0.00  | 0.22 | 0.08 | 75% | 75%    |
| 0.4      | 0.37    | 0.01  | 0.22 | 0.10 | 76% | 76%    | 0.4      | 0.27    | 0.00  | 0.17 | 0.07 | 75% | 76%    |
| 0.5      | 0.36    | 0.00  | 0.25 | 0.09 | 76% | 76%    | 0.5      | 0.27    | 0.01  | 0.16 | 0.06 | 76% | 76%    |
| 0.6      | 0.36    | 0.01  | 0.22 | 0.08 | 74% | 74%    | 0.6      | 0.26    | 0.00  | 0.18 | 0.06 | 75% | 75%    |
| 0.7      | 0.35    | -0.01 | 0.19 | 0.08 | 82% | 82%    | 0.7      | 0.26    | -0.01 | 0.15 | 0.06 | 82% | 82%    |
| 0.8      | 0.34    | 0.00  | 0.14 | 0.08 | 84% | 84%    | 0.8      | 0.26    | 0.00  | 0.10 | 0.06 | 85% | 85%    |
| 0.9      | 0.34    | 0.00  | 0.10 | 0.08 | 87% | 87%    | 0.9      | 0.25    | 0.00  | 0.08 | 0.06 | 88% | 88%    |

**Web Table 12**

*Simulation results as in Table 1 of main text, but censoring times  $C_{ij}$  randomly sampled from an Exponential distribution with mean  $1/\lambda_0$  where  $\lambda_0 = 0.0025 \exp(0.002L_{1ij} + 0.015L_{2ij})e_i$ , resulting in an average of 33% of individuals being censored.*

| <i>Proposed IPCW estimator</i> |         |       |      |      |     |        |          |         |       |      |      |     |        |
|--------------------------------|---------|-------|------|------|-----|--------|----------|---------|-------|------|------|-----|--------|
| $\alpha$                       | $\mu_0$ | Bias  | ESE  | MSE  | EC  | $EC_t$ | $\alpha$ | $\mu_1$ | Bias  | ESE  | MSE  | EC  | $EC_t$ |
| 0.1                            | 0.39    | -0.02 | 0.06 | 0.06 | 94% | 94%    | 0.1      | 0.28    | -0.01 | 0.07 | 0.06 | 94% | 94%    |
| 0.2                            | 0.38    | -0.01 | 0.03 | 0.03 | 96% | 96%    | 0.2      | 0.28    | -0.01 | 0.04 | 0.04 | 94% | 94%    |
| 0.3                            | 0.38    | -0.01 | 0.02 | 0.02 | 96% | 96%    | 0.3      | 0.27    | 0.00  | 0.02 | 0.02 | 95% | 95%    |
| 0.4                            | 0.37    | 0.00  | 0.02 | 0.02 | 94% | 94%    | 0.4      | 0.27    | 0.00  | 0.02 | 0.02 | 94% | 94%    |
| 0.5                            | 0.37    | 0.00  | 0.02 | 0.02 | 94% | 94%    | 0.5      | 0.27    | 0.00  | 0.01 | 0.01 | 94% | 94%    |
| 0.6                            | 0.36    | 0.00  | 0.02 | 0.02 | 95% | 95%    | 0.6      | 0.26    | 0.00  | 0.01 | 0.01 | 94% | 94%    |
| 0.7                            | 0.35    | 0.00  | 0.02 | 0.02 | 95% | 95%    | 0.7      | 0.26    | 0.00  | 0.01 | 0.01 | 95% | 95%    |
| 0.8                            | 0.35    | 0.00  | 0.02 | 0.02 | 95% | 95%    | 0.8      | 0.26    | -0.00 | 0.01 | 0.01 | 96% | 96%    |
| 0.9                            | 0.34    | 0.00  | 0.04 | 0.04 | 94% | 94%    | 0.9      | 0.26    | 0.00  | 0.02 | 0.02 | 96% | 96%    |

  

| <i>Tchetgen Tchetgen and VanderWeele (2012) estimator</i> |         |       |      |      |     |        |          |         |       |      |      |     |        |
|-----------------------------------------------------------|---------|-------|------|------|-----|--------|----------|---------|-------|------|------|-----|--------|
| $\alpha$                                                  | $\mu_0$ | Bias  | ESE  | MSE  | EC  | $EC_t$ | $\alpha$ | $\mu_1$ | Bias  | ESE  | MSE  | EC  | $EC_t$ |
| 0.1                                                       | 0.39    | -0.15 | 0.08 | 0.06 | 40% | 40%    | 0.1      | 0.28    | -0.15 | 0.07 | 0.06 | 32% | 32%    |
| 0.2                                                       | 0.38    | -0.14 | 0.03 | 0.03 | 12% | 12%    | 0.2      | 0.28    | -0.15 | 0.04 | 0.03 | 6%  | 6%     |
| 0.3                                                       | 0.38    | -0.13 | 0.03 | 0.02 | 8%  | 8%     | 0.3      | 0.27    | -0.15 | 0.03 | 0.02 | 3%  | 3%     |
| 0.4                                                       | 0.37    | -0.13 | 0.02 | 0.02 | 3%  | 3%     | 0.4      | 0.27    | -0.14 | 0.02 | 0.02 | 4%  | 4%     |
| 0.5                                                       | 0.37    | -0.12 | 0.02 | 0.02 | 5%  | 5%     | 0.5      | 0.27    | -0.14 | 0.02 | 0.01 | 5%  | 5%     |
| 0.6                                                       | 0.36    | -0.12 | 0.02 | 0.02 | 7%  | 7%     | 0.6      | 0.26    | -0.14 | 0.02 | 0.01 | 5%  | 5%     |
| 0.7                                                       | 0.35    | -0.12 | 0.02 | 0.02 | 7%  | 7%     | 0.7      | 0.26    | -0.14 | 0.02 | 0.01 | 3%  | 3%     |
| 0.8                                                       | 0.35    | -0.13 | 0.03 | 0.02 | 6%  | 6%     | 0.8      | 0.26    | -0.15 | 0.02 | 0.01 | 2%  | 2%     |
| 0.9                                                       | 0.34    | -0.13 | 0.04 | 0.03 | 6%  | 6%     | 0.9      | 0.26    | -0.16 | 0.02 | 0.02 | 7%  | 7%     |

**Web Table 13**

*Simulation results as in Table 1 of main text, but with the censoring times generated in step (vi) from an Exponential distribution with mean  $1/\lambda_0$  where  $\lambda_0 = 0.005 \exp(0.002L_{1ij} + 0.015L_{2ij})e_i$ , resulting in an average of 45% of individuals being censored.*

| <i>Proposed IPCW estimator</i> |         |       |      |      |     |        |          |         |       |      |      |     |        |
|--------------------------------|---------|-------|------|------|-----|--------|----------|---------|-------|------|------|-----|--------|
| $\alpha$                       | $\mu_0$ | Bias  | ESE  | MSE  | EC  | $EC_t$ | $\alpha$ | $\mu_1$ | Bias  | ESE  | MSE  | EC  | $EC_t$ |
| 0.1                            | 0.39    | -0.02 | 0.06 | 0.06 | 96% | 96%    | 0.1      | 0.28    | -0.01 | 0.07 | 0.06 | 92% | 92%    |
| 0.2                            | 0.38    | -0.01 | 0.03 | 0.03 | 96% | 96%    | 0.2      | 0.28    | -0.00 | 0.04 | 0.04 | 94% | 94%    |
| 0.3                            | 0.38    | -0.01 | 0.02 | 0.02 | 95% | 95%    | 0.3      | 0.27    | -0.00 | 0.03 | 0.02 | 94% | 94%    |
| 0.4                            | 0.37    | 0.00  | 0.02 | 0.02 | 96% | 96%    | 0.4      | 0.27    | 0.00  | 0.02 | 0.02 | 94% | 94%    |
| 0.5                            | 0.37    | 0.00  | 0.02 | 0.02 | 96% | 96%    | 0.5      | 0.27    | 0.00  | 0.01 | 0.01 | 94% | 94%    |
| 0.6                            | 0.36    | 0.00  | 0.02 | 0.02 | 95% | 95%    | 0.6      | 0.27    | 0.00  | 0.01 | 0.01 | 94% | 94%    |
| 0.7                            | 0.35    | 0.00  | 0.02 | 0.02 | 94% | 94%    | 0.7      | 0.26    | 0.00  | 0.01 | 0.01 | 94% | 94%    |
| 0.8                            | 0.35    | 0.00  | 0.03 | 0.03 | 94% | 95%    | 0.8      | 0.26    | -0.00 | 0.01 | 0.01 | 95% | 95%    |
| 0.9                            | 0.34    | 0.00  | 0.04 | 0.04 | 94% | 94%    | 0.9      | 0.26    | -0.01 | 0.02 | 0.02 | 96% | 97%    |

  

| <i>Tchetgen Tchetgen and VanderWeele (2012) estimator</i> |         |       |      |      |     |        |          |         |       |      |      |    |        |
|-----------------------------------------------------------|---------|-------|------|------|-----|--------|----------|---------|-------|------|------|----|--------|
| $\alpha$                                                  | $\mu_0$ | Bias  | ESE  | MSE  | EC  | $EC_t$ | $\alpha$ | $\mu_1$ | Bias  | ESE  | MSE  | EC | $EC_t$ |
| 0.1                                                       | 0.39    | -0.23 | 0.09 | 0.05 | 13% | 13%    | 0.1      | 0.28    | -0.24 | 0.08 | 0.05 | 6% | 6%     |
| 0.2                                                       | 0.38    | -0.22 | 0.05 | 0.03 | 6%  | 6%     | 0.2      | 0.28    | -0.24 | 0.05 | 0.03 | 2% | 2%     |
| 0.3                                                       | 0.38    | -0.21 | 0.03 | 0.02 | 4%  | 4%     | 0.3      | 0.27    | -0.24 | 0.03 | 0.02 | 1% | 1%     |
| 0.4                                                       | 0.37    | -0.21 | 0.03 | 0.02 | 2%  | 2%     | 0.4      | 0.27    | -0.23 | 0.02 | 0.02 | 2% | 2%     |
| 0.5                                                       | 0.37    | -0.21 | 0.02 | 0.02 | 3%  | 3%     | 0.5      | 0.27    | -0.23 | 0.02 | 0.02 | 3% | 3%     |
| 0.6                                                       | 0.36    | -0.20 | 0.02 | 0.02 | 3%  | 3%     | 0.6      | 0.27    | -0.23 | 0.02 | 0.02 | 2% | 2%     |
| 0.7                                                       | 0.35    | -0.21 | 0.02 | 0.02 | 3%  | 3%     | 0.7      | 0.26    | -0.24 | 0.02 | 0.02 | 1% | 1%     |
| 0.8                                                       | 0.35    | -0.21 | 0.03 | 0.02 | 3%  | 3%     | 0.8      | 0.26    | -0.24 | 0.02 | 0.02 | 1% | 1%     |
| 0.9                                                       | 0.34    | -0.21 | 0.04 | 0.03 | 1%  | 1%     | 0.9      | 0.26    | -0.25 | 0.03 | 0.02 | 4% | 4%     |

**Web Table 14**

*Simulation results as in Table 1 of main text, but censoring times  $C_{ij}$  randomly sampled from an Exponential distribution with mean  $1/\lambda_0$  where  $\lambda_0 = 0.015 \exp(0.002L_{1ij} + 0.015L_{2ij})e_i$ , resulting in an average of 65% of individuals being censored.*

*Proposed IPCW estimator*

| $\alpha$ | $\mu_0$ | Bias  | ESE  | MSE  | EC  | EC <sub>t</sub> | $\alpha$ | $\mu_1$ | Bias  | ESE  | MSE  | EC  | EC <sub>t</sub> |
|----------|---------|-------|------|------|-----|-----------------|----------|---------|-------|------|------|-----|-----------------|
| 0.1      | 0.39    | -0.02 | 0.07 | 0.07 | 95% | 95%             | 0.1      | 0.28    | -0.01 | 0.08 | 0.08 | 92% | 92%             |
| 0.2      | 0.38    | -0.01 | 0.04 | 0.04 | 95% | 95%             | 0.2      | 0.28    | -0.00 | 0.04 | 0.04 | 95% | 95%             |
| 0.3      | 0.38    | -0.01 | 0.03 | 0.03 | 95% | 95%             | 0.3      | 0.27    | -0.00 | 0.03 | 0.03 | 94% | 94%             |
| 0.4      | 0.37    | -0.00 | 0.03 | 0.02 | 95% | 95%             | 0.4      | 0.27    | 0.00  | 0.02 | 0.02 | 94% | 94%             |
| 0.5      | 0.37    | 0.00  | 0.03 | 0.02 | 96% | 96%             | 0.5      | 0.27    | 0.00  | 0.02 | 0.02 | 94% | 94%             |
| 0.6      | 0.36    | 0.00  | 0.02 | 0.02 | 94% | 95%             | 0.6      | 0.27    | 0.00  | 0.02 | 0.02 | 94% | 94%             |
| 0.7      | 0.35    | 0.01  | 0.02 | 0.02 | 95% | 95%             | 0.7      | 0.26    | 0.00  | 0.01 | 0.01 | 96% | 96%             |
| 0.8      | 0.35    | 0.00  | 0.03 | 0.03 | 96% | 96%             | 0.8      | 0.26    | -0.00 | 0.02 | 0.02 | 96% | 96%             |
| 0.9      | 0.34    | 0.00  | 0.05 | 0.05 | 95% | 95%             | 0.9      | 0.26    | -0.00 | 0.02 | 0.02 | 96% | 96%             |

*Tchetgen Tchetgen and VanderWeele (2012) estimator*

| $\alpha$ | $\mu_0$ | Bias  | ESE  | MSE  | EC | EC <sub>t</sub> | $\alpha$ | $\mu_1$ | Bias  | ESE  | MSE  | EC | EC <sub>t</sub> |
|----------|---------|-------|------|------|----|-----------------|----------|---------|-------|------|------|----|-----------------|
| 0.1      | 0.39    | -0.39 | 0.10 | 0.05 | 6% | 6%              | 0.1      | 0.28    | -0.43 | 0.08 | 0.05 | 3% | 3%              |
| 0.2      | 0.38    | -0.38 | 0.05 | 0.03 | 5% | 5%              | 0.2      | 0.28    | -0.42 | 0.05 | 0.04 | 1% | 1%              |
| 0.3      | 0.38    | -0.37 | 0.04 | 0.03 | 2% | 2%              | 0.3      | 0.27    | -0.42 | 0.04 | 0.03 | 0% | 0%              |
| 0.4      | 0.37    | -0.36 | 0.03 | 0.03 | 1% | 1%              | 0.4      | 0.27    | -0.41 | 0.03 | 0.03 | 1% | 1%              |
| 0.5      | 0.37    | -0.36 | 0.03 | 0.03 | 2% | 2%              | 0.5      | 0.27    | -0.41 | 0.02 | 0.03 | 1% | 1%              |
| 0.6      | 0.36    | -0.36 | 0.02 | 0.03 | 2% | 2%              | 0.6      | 0.27    | -0.42 | 0.02 | 0.03 | 1% | 1%              |
| 0.7      | 0.35    | -0.36 | 0.02 | 0.03 | 2% | 2%              | 0.7      | 0.26    | -0.42 | 0.02 | 0.03 | 1% | 1%              |
| 0.8      | 0.35    | -0.37 | 0.03 | 0.03 | 2% | 2%              | 0.8      | 0.26    | -0.43 | 0.02 | 0.03 | 1% | 1%              |
| 0.9      | 0.34    | -0.38 | 0.05 | 0.04 | 1% | 1%              | 0.9      | 0.26    | -0.44 | 0.03 | 0.03 | 2% | 2%              |

**Web Table 15**

*Simulation results as in Table 1 of the main text, but with the distribution of the random effect  $b_i$  in the treatment model misspecified. Data were generated in step (ii) such that  $b_i$  was from a logistic distribution with mean 0 and variance 1.0859. However, the mixed effect logistic treatment model was fit assuming a Normal random effect distribution.*

| $\alpha$ | $\mu_0$ | Bias  | ESE  | MSE  | EC  | EC <sub>t</sub> | $\alpha$ | $\mu_1$ | Bias  | ESE  | MSE  | EC  | EC <sub>t</sub> |
|----------|---------|-------|------|------|-----|-----------------|----------|---------|-------|------|------|-----|-----------------|
| 0.1      | 0.39    | -0.05 | 0.09 | 0.08 | 95% | 95%             | 0.1      | 0.28    | 0.00  | 0.08 | 0.08 | 89% | 89%             |
| 0.2      | 0.38    | -0.01 | 0.04 | 0.04 | 97% | 97%             | 0.2      | 0.28    | 0.01  | 0.05 | 0.04 | 92% | 92%             |
| 0.3      | 0.38    | 0.00  | 0.03 | 0.03 | 95% | 95%             | 0.3      | 0.27    | 0.00  | 0.03 | 0.03 | 93% | 93%             |
| 0.4      | 0.37    | 0.00  | 0.02 | 0.02 | 94% | 94%             | 0.4      | 0.27    | 0.00  | 0.02 | 0.02 | 94% | 94%             |
| 0.5      | 0.37    | 0.00  | 0.02 | 0.02 | 95% | 95%             | 0.5      | 0.27    | 0.00  | 0.02 | 0.02 | 95% | 95%             |
| 0.6      | 0.36    | 0.00  | 0.02 | 0.02 | 96% | 96%             | 0.6      | 0.27    | -0.00 | 0.02 | 0.02 | 95% | 95%             |
| 0.7      | 0.35    | -0.00 | 0.02 | 0.02 | 96% | 96%             | 0.7      | 0.26    | 0.00  | 0.01 | 0.01 | 96% | 96%             |
| 0.8      | 0.35    | 0.00  | 0.03 | 0.03 | 94% | 94%             | 0.8      | 0.26    | 0.00  | 0.02 | 0.02 | 96% | 96%             |
| 0.9      | 0.34    | 0.00  | 0.05 | 0.05 | 93% | 93%             | 0.9      | 0.26    | -0.00 | 0.02 | 0.02 | 97% | 97%             |



**Web Table 16**

*Simulation results as in Table 1 of the main text, but with the distribution of the random effect  $b_i$  in the treatment model misspecified. Data were generated in step (ii) such that  $b_i$  was from a Gumbel distribution with mean 0 and variance 1.0859. However, the mixed effect logistic treatment model was fit assuming a Normal random effect distribution.*

| $\alpha$ | $\mu_0$ | Bias  | ESE  | MSE  | EC  | $EC_t$ | $\alpha$ | $\mu_1$ | Bias  | ESE  | MSE  | EC  | $EC_t$ |
|----------|---------|-------|------|------|-----|--------|----------|---------|-------|------|------|-----|--------|
| 0.1      | 0.39    | 0.09  | 0.07 | 0.06 | 64% | 64%    | 0.1      | 0.28    | 0.01  | 0.07 | 0.07 | 88% | 89%    |
| 0.2      | 0.38    | 0.03  | 0.04 | 0.04 | 85% | 85%    | 0.2      | 0.28    | -0.01 | 0.04 | 0.04 | 96% | 96%    |
| 0.3      | 0.38    | -0.01 | 0.03 | 0.03 | 96% | 96%    | 0.3      | 0.27    | -0.02 | 0.03 | 0.03 | 93% | 93%    |
| 0.4      | 0.37    | -0.02 | 0.02 | 0.02 | 90% | 90%    | 0.4      | 0.27    | -0.01 | 0.02 | 0.02 | 93% | 93%    |
| 0.5      | 0.36    | -0.02 | 0.02 | 0.02 | 89% | 89%    | 0.5      | 0.27    | -0.00 | 0.02 | 0.02 | 96% | 96%    |
| 0.6      | 0.36    | -0.01 | 0.02 | 0.02 | 95% | 95%    | 0.6      | 0.27    | 0.01  | 0.02 | 0.01 | 92% | 92%    |
| 0.7      | 0.35    | 0.01  | 0.02 | 0.02 | 89% | 89%    | 0.7      | 0.26    | 0.01  | 0.01 | 0.01 | 82% | 82%    |
| 0.8      | 0.35    | 0.03  | 0.03 | 0.03 | 81% | 81%    | 0.8      | 0.26    | 0.01  | 0.02 | 0.02 | 93% | 94%    |
| 0.9      | 0.34    | 0.03  | 0.05 | 0.05 | 84% | 85%    | 0.9      | 0.26    | -0.03 | 0.03 | 0.03 | 88% | 88%    |

**Web Table 17**

*Simulation results as in Table 1 of the main text, but with the distribution of the random effect  $b_i$  in the treatment model misspecified. Data were generated in step (ii) such that  $b_i$  was from a  $t$  distribution with 10 degrees of freedom, mean 0 and variance 1.25. However, the mixed effect logistic treatment model was fit assuming a Normal random effect distribution.*

| $\alpha$ | $\mu_0$ | Bias  | ESE  | MSE  | EC  | $EC_t$ | $\alpha$ | $\mu_1$ | Bias  | ESE  | MSE  | EC  | $EC_t$ |
|----------|---------|-------|------|------|-----|--------|----------|---------|-------|------|------|-----|--------|
| 0.1      | 0.39    | -0.04 | 0.08 | 0.07 | 95% | 95%    | 0.1      | 0.28    | -0.00 | 0.08 | 0.07 | 92% | 92%    |
| 0.2      | 0.38    | -0.01 | 0.04 | 0.04 | 96% | 96%    | 0.2      | 0.28    | 0.00  | 0.04 | 0.04 | 94% | 94%    |
| 0.3      | 0.38    | 0.00  | 0.03 | 0.03 | 96% | 96%    | 0.3      | 0.27    | 0.00  | 0.03 | 0.03 | 94% | 94%    |
| 0.4      | 0.37    | 0.00  | 0.02 | 0.02 | 95% | 95%    | 0.4      | 0.27    | 0.00  | 0.02 | 0.02 | 96% | 96%    |
| 0.5      | 0.37    | 0.00  | 0.02 | 0.02 | 94% | 94%    | 0.5      | 0.27    | 0.00  | 0.02 | 0.02 | 95% | 95%    |
| 0.6      | 0.36    | 0.00  | 0.02 | 0.02 | 93% | 94%    | 0.6      | 0.27    | 0.00  | 0.02 | 0.02 | 95% | 95%    |
| 0.7      | 0.35    | 0.00  | 0.02 | 0.02 | 94% | 94%    | 0.7      | 0.26    | 0.00  | 0.02 | 0.01 | 95% | 95%    |
| 0.8      | 0.35    | 0.00  | 0.03 | 0.03 | 95% | 95%    | 0.8      | 0.26    | 0.00  | 0.02 | 0.02 | 95% | 95%    |
| 0.9      | 0.34    | 0.00  | 0.05 | 0.05 | 94% | 94%    | 0.9      | 0.26    | -0.00 | 0.02 | 0.02 | 96% | 96%    |

**Web Table 18**

*Simulation results as in Table 1 of the main text, but with the distribution of the random effect  $b_i$  in the treatment model misspecified. Data were generated in step (ii) such that  $b_i$  was from a 50:50 mixture of two Normal distributions with means -1 and 1, and standard deviations equal to 0.3, so  $b_i$  had mean 0 and variance approximately 1.09. However, the mixed effect logistic treatment model was fit assuming a Normal random effect distribution.*

| $\alpha$ | $\mu_0$ | Bias  | ESE  | MSE  | EC  | EC <sub>t</sub> | $\alpha$ | $\mu_1$ | Bias  | ESE  | MSE  | EC  | EC <sub>t</sub> |
|----------|---------|-------|------|------|-----|-----------------|----------|---------|-------|------|------|-----|-----------------|
| 0.1      | 0.39    | 0.10  | 0.05 | 0.04 | 46% | 46%             | 0.1      | 0.28    | -0.03 | 0.07 | 0.07 | 95% | 95%             |
| 0.2      | 0.38    | -0.00 | 0.04 | 0.03 | 95% | 95%             | 0.2      | 0.28    | -0.05 | 0.05 | 0.04 | 86% | 86%             |
| 0.3      | 0.38    | -0.05 | 0.03 | 0.03 | 72% | 72%             | 0.3      | 0.27    | -0.04 | 0.03 | 0.03 | 83% | 83%             |
| 0.4      | 0.37    | -0.04 | 0.03 | 0.03 | 70% | 70%             | 0.4      | 0.27    | -0.01 | 0.03 | 0.02 | 94% | 94%             |
| 0.5      | 0.37    | -0.01 | 0.03 | 0.02 | 93% | 94%             | 0.5      | 0.27    | 0.02  | 0.02 | 0.02 | 79% | 80%             |
| 0.6      | 0.36    | 0.02  | 0.02 | 0.02 | 76% | 76%             | 0.6      | 0.27    | 0.02  | 0.02 | 0.01 | 62% | 62%             |
| 0.7      | 0.35    | 0.04  | 0.02 | 0.02 | 63% | 63%             | 0.7      | 0.26    | 0.01  | 0.02 | 0.01 | 83% | 83%             |
| 0.8      | 0.35    | 0.02  | 0.03 | 0.03 | 89% | 89%             | 0.8      | 0.26    | -0.01 | 0.02 | 0.02 | 92% | 92%             |
| 0.9      | 0.34    | -0.03 | 0.05 | 0.05 | 95% | 95%             | 0.9      | 0.26    | -0.02 | 0.02 | 0.02 | 91% | 91%             |

**Web Table 19**

Simulation results as in Table 1 of the main text, but with the distribution of the random effect  $b_i$  in the treatment model misspecified. Data were generated in step (ii) such that  $b_i = X - E[X]$  where  $X$  was from an Exponential distribution with mean 1.0421, such that  $b_i$  had mean 0, variance approximately 1.09, and skewness 2. However, the mixed effect logistic treatment model was fit assuming a Normal random effect distribution.

| $\alpha$ | $\mu_0$ | Bias  | ESE  | MSE  | EC  | EC <sub>t</sub> | $\alpha$ | $\mu_0$ | Bias  | ESE  | MSE  | EC  | EC <sub>t</sub> |
|----------|---------|-------|------|------|-----|-----------------|----------|---------|-------|------|------|-----|-----------------|
| 0.1      | 0.39    | 0.17  | 0.07 | 0.05 | 28% | 28%             | 0.1      | 0.28    | 0.04  | 0.07 | 0.06 | 76% | 76%             |
| 0.2      | 0.38    | 0.08  | 0.04 | 0.04 | 46% | 46%             | 0.2      | 0.28    | -0.00 | 0.04 | 0.04 | 94% | 94%             |
| 0.3      | 0.38    | 0.01  | 0.03 | 0.03 | 92% | 92%             | 0.3      | 0.27    | -0.03 | 0.03 | 0.03 | 90% | 90%             |
| 0.4      | 0.37    | -0.02 | 0.02 | 0.02 | 87% | 87%             | 0.4      | 0.27    | -0.02 | 0.02 | 0.02 | 85% | 86%             |
| 0.5      | 0.37    | -0.03 | 0.02 | 0.02 | 75% | 75%             | 0.5      | 0.27    | -0.01 | 0.02 | 0.02 | 94% | 95%             |
| 0.6      | 0.36    | -0.01 | 0.02 | 0.02 | 95% | 95%             | 0.6      | 0.27    | 0.01  | 0.01 | 0.01 | 86% | 86%             |
| 0.7      | 0.35    | 0.02  | 0.02 | 0.02 | 88% | 88%             | 0.7      | 0.26    | 0.02  | 0.01 | 0.01 | 64% | 64%             |
| 0.8      | 0.35    | 0.04  | 0.03 | 0.03 | 64% | 65%             | 0.8      | 0.26    | 0.00  | 0.02 | 0.02 | 92% | 92%             |
| 0.9      | 0.34    | 0.05  | 0.05 | 0.05 | 76% | 76%             | 0.9      | 0.26    | -0.06 | 0.03 | 0.03 | 64% | 65%             |

**Web Table 20**

*Simulation results as in Table 1 of the main text, but with the distribution of the random effect  $b_i$  in the treatment model misspecified. Data were generated in step (ii) such that  $b_i = X - E[X]$  where  $X = 2.8B$  and  $B$  was from a Beta distribution with shape parameters 0.2 and 0.4, such that the mean of  $b_i$  was 0, variance was approximately 1.09, and skewness was approximately 0.69. However, the mixed effect logistic treatment model was fit assuming a Normal random effect distribution.*

| $\alpha$ | $\mu_0$ | Bias  | ESE  | MSE  | EC  | EC <sub>t</sub> | $\alpha$ | $\mu_1$ | Bias  | ESE  | MSE  | EC  | EC <sub>t</sub> |
|----------|---------|-------|------|------|-----|-----------------|----------|---------|-------|------|------|-----|-----------------|
| 0.1      | 0.39    | 0.09  | 0.24 | 0.09 | 55% | 55%             | 0.1      | 0.28    | 0.02  | 0.15 | 0.08 | 68% | 68%             |
| 0.2      | 0.38    | 0.04  | 0.11 | 0.08 | 74% | 74%             | 0.2      | 0.28    | 0.00  | 0.07 | 0.06 | 88% | 88%             |
| 0.3      | 0.38    | 0.01  | 0.05 | 0.05 | 89% | 89%             | 0.3      | 0.27    | -0.00 | 0.04 | 0.04 | 92% | 92%             |
| 0.4      | 0.37    | -0.00 | 0.03 | 0.03 | 95% | 95%             | 0.4      | 0.27    | -0.00 | 0.02 | 0.02 | 93% | 93%             |
| 0.5      | 0.37    | -0.00 | 0.02 | 0.02 | 95% | 95%             | 0.5      | 0.27    | -0.00 | 0.02 | 0.02 | 95% | 95%             |
| 0.6      | 0.36    | -0.00 | 0.02 | 0.02 | 94% | 94%             | 0.6      | 0.27    | 0.00  | 0.01 | 0.01 | 95% | 95%             |
| 0.7      | 0.35    | 0.00  | 0.02 | 0.02 | 94% | 94%             | 0.7      | 0.26    | 0.00  | 0.02 | 0.01 | 95% | 95%             |
| 0.8      | 0.35    | 0.01  | 0.03 | 0.03 | 92% | 93%             | 0.8      | 0.26    | -0.01 | 0.02 | 0.02 | 94% | 94%             |
| 0.9      | 0.34    | 0.00  | 0.06 | 0.05 | 92% | 92%             | 0.9      | 0.26    | -0.02 | 0.04 | 0.04 | 94% | 94%             |

**Web Table 21**

*Simulation results as in Table 1 of the main text, but with the distribution of the random effect  $b_i$  in the treatment model misspecified. Data were generated in step (ii) such that  $b_i = X - E[X]$  where  $X = 6.8B$  and  $B$  was from a Beta distribution with shape parameters 2 and 4, such that the distribution of  $b_i$  was bimodal with mean of 0, variance approximately 1.14, and skewness approximately 0.47. However, the mixed effect logistic treatment model was fit assuming a Normal random effect distribution.*

| $\alpha$ | $\mu_0$ | Bias  | ESE  | MSE  | EC  | $EC_t$ | $\alpha$ | $\mu_1$ | Bias  | ESE  | MSE  | EC  | $EC_t$ |
|----------|---------|-------|------|------|-----|--------|----------|---------|-------|------|------|-----|--------|
| 0.1      | 0.39    | 0.07  | 0.06 | 0.06 | 69% | 69%    | 0.1      | 0.28    | -0.01 | 0.07 | 0.07 | 92% | 92%    |
| 0.2      | 0.38    | 0.01  | 0.03 | 0.04 | 93% | 93%    | 0.2      | 0.28    | -0.02 | 0.04 | 0.04 | 94% | 94%    |
| 0.3      | 0.38    | -0.02 | 0.03 | 0.03 | 94% | 94%    | 0.3      | 0.27    | -0.02 | 0.03 | 0.03 | 92% | 92%    |
| 0.4      | 0.37    | -0.02 | 0.03 | 0.02 | 87% | 87%    | 0.4      | 0.27    | -0.01 | 0.02 | 0.02 | 94% | 94%    |
| 0.5      | 0.37    | -0.01 | 0.02 | 0.02 | 93% | 93%    | 0.5      | 0.27    | 0.00  | 0.02 | 0.02 | 94% | 94%    |
| 0.6      | 0.36    | 0.00  | 0.02 | 0.02 | 95% | 95%    | 0.6      | 0.27    | 0.01  | 0.02 | 0.02 | 86% | 86%    |
| 0.7      | 0.35    | 0.02  | 0.02 | 0.02 | 89% | 89%    | 0.7      | 0.26    | 0.01  | 0.02 | 0.01 | 84% | 84%    |
| 0.8      | 0.35    | 0.02  | 0.03 | 0.03 | 86% | 86%    | 0.8      | 0.26    | 0.00  | 0.02 | 0.02 | 93% | 93%    |
| 0.9      | 0.34    | 0.02  | 0.05 | 0.05 | 92% | 92%    | 0.9      | 0.26    | -0.02 | 0.02 | 0.02 | 94% | 94%    |

**Web Table 22**

*Simulation results as in Table 1 of the main text, but with the distribution of the random effect  $b_i$  in the treatment model misspecified. Data were generated in step (ii) such that  $b_i \sim \text{Uniform}(-1.8, 1.8)$ , with mean 0 and variance 1.08. However, the mixed effect logistic treatment model was fit assuming a Normal random effect distribution.*

| $\alpha$ | $\mu_0$ | Bias  | ESE  | MSE  | EC  | $EC_t$ | $\alpha$ | $\mu_1$ | Bias  | ESE  | MSE  | EC  | $EC_t$ |
|----------|---------|-------|------|------|-----|--------|----------|---------|-------|------|------|-----|--------|
| 0.1      | 0.39    | 0.05  | 0.06 | 0.06 | 79% | 79%    | 0.1      | 0.28    | -0.02 | 0.07 | 0.07 | 95% | 95%    |
| 0.2      | 0.38    | -0.01 | 0.04 | 0.04 | 95% | 95%    | 0.2      | 0.28    | -0.03 | 0.04 | 0.04 | 94% | 94%    |
| 0.3      | 0.38    | -0.03 | 0.03 | 0.03 | 90% | 90%    | 0.3      | 0.27    | -0.02 | 0.03 | 0.03 | 95% | 95%    |
| 0.4      | 0.37    | -0.02 | 0.03 | 0.02 | 90% | 90%    | 0.4      | 0.27    | -0.00 | 0.02 | 0.02 | 95% | 95%    |
| 0.5      | 0.37    | -0.00 | 0.02 | 0.02 | 95% | 95%    | 0.5      | 0.27    | 0.01  | 0.02 | 0.02 | 90% | 90%    |
| 0.6      | 0.36    | 0.01  | 0.02 | 0.02 | 89% | 89%    | 0.6      | 0.27    | 0.01  | 0.01 | 0.02 | 86% | 86%    |
| 0.7      | 0.35    | 0.02  | 0.02 | 0.02 | 85% | 85%    | 0.7      | 0.26    | 0.01  | 0.01 | 0.01 | 92% | 92%    |
| 0.8      | 0.35    | 0.01  | 0.03 | 0.03 | 92% | 92%    | 0.8      | 0.26    | -0.00 | 0.02 | 0.02 | 96% | 96%    |
| 0.9      | 0.34    | -0.01 | 0.05 | 0.05 | 94% | 94%    | 0.9      | 0.26    | -0.01 | 0.02 | 0.02 | 94% | 95%    |

**Web Table 23**

*Simulation results as in Table 1 of the main text, but with the frailty censoring model mis-specified; the covariate  $L_{2ij}$  was incorrectly omitted from the model, despite  $L_{2ij}$  being a component of the data generation process for censoring times  $C_{ij}$ .*

| $\alpha$ | $\mu_0$ | Bias  | ESE  | MSE  | EC  | $EC_t$ | $\alpha$ | $\mu_1$ | Bias  | ESE  | MSE  | EC  | $EC_t$ |
|----------|---------|-------|------|------|-----|--------|----------|---------|-------|------|------|-----|--------|
| 0.1      | 0.39    | -0.02 | 0.07 | 0.07 | 94% | 94%    | 0.1      | 0.28    | -0.01 | 0.08 | 0.08 | 91% | 91%    |
| 0.2      | 0.38    | -0.01 | 0.04 | 0.04 | 95% | 95%    | 0.2      | 0.28    | -0.00 | 0.05 | 0.04 | 93% | 93%    |
| 0.3      | 0.38    | -0.00 | 0.03 | 0.03 | 96% | 96%    | 0.3      | 0.27    | 0.00  | 0.03 | 0.03 | 93% | 93%    |
| 0.4      | 0.37    | 0.00  | 0.03 | 0.02 | 96% | 96%    | 0.4      | 0.27    | 0.00  | 0.02 | 0.02 | 95% | 95%    |
| 0.5      | 0.36    | 0.00  | 0.02 | 0.02 | 94% | 94%    | 0.5      | 0.27    | 0.00  | 0.02 | 0.02 | 95% | 95%    |
| 0.6      | 0.36    | 0.01  | 0.02 | 0.02 | 94% | 94%    | 0.6      | 0.27    | 0.00  | 0.02 | 0.02 | 95% | 95%    |
| 0.7      | 0.35    | 0.01  | 0.02 | 0.02 | 93% | 93%    | 0.7      | 0.26    | 0.00  | 0.02 | 0.01 | 95% | 95%    |
| 0.8      | 0.35    | 0.00  | 0.03 | 0.03 | 95% | 95%    | 0.8      | 0.26    | -0.00 | 0.02 | 0.02 | 96% | 96%    |
| 0.9      | 0.34    | 0.00  | 0.05 | 0.05 | 93% | 93%    | 0.9      | 0.26    | -0.00 | 0.02 | 0.02 | 96% | 96%    |



**Web Table 24**

*Simulation results as in Table 1 of the main text, but with the censoring times generated in step (vi) such that  $\lambda_0 = 0.015 \exp(0.002L_{1ij} + 0.015L_{2ij} + 0.01A_{ij})$ . The IPCW estimator frailty censoring model was correctly specified by including terms for each of the three covariates  $L_{1ij}$ ,  $L_{2ij}$ , and  $A_{ij}$ .*

| $\alpha$ | $\mu_0$ | Bias  | ESE  | MSE  | EC  | $EC_t$ | $\alpha$ | $\mu_1$ | Bias  | ESE  | MSE  | EC  | $EC_t$ |
|----------|---------|-------|------|------|-----|--------|----------|---------|-------|------|------|-----|--------|
| 0.1      | 0.39    | -0.02 | 0.08 | 0.07 | 95% | 95%    | 0.1      | 0.28    | -0.00 | 0.08 | 0.07 | 90% | 90%    |
| 0.2      | 0.38    | -0.01 | 0.04 | 0.04 | 96% | 96%    | 0.2      | 0.28    | -0.00 | 0.04 | 0.04 | 93% | 93%    |
| 0.3      | 0.38    | -0.00 | 0.03 | 0.03 | 96% | 96%    | 0.3      | 0.27    | 0.00  | 0.03 | 0.03 | 93% | 93%    |
| 0.4      | 0.37    | 0.00  | 0.02 | 0.02 | 95% | 95%    | 0.4      | 0.27    | 0.00  | 0.02 | 0.02 | 93% | 93%    |
| 0.5      | 0.36    | 0.00  | 0.02 | 0.02 | 94% | 95%    | 0.5      | 0.27    | 0.00  | 0.02 | 0.02 | 93% | 93%    |
| 0.6      | 0.36    | 0.00  | 0.02 | 0.02 | 94% | 94%    | 0.6      | 0.27    | 0.00  | 0.02 | 0.02 | 94% | 94%    |
| 0.7      | 0.35    | 0.00  | 0.02 | 0.02 | 94% | 94%    | 0.7      | 0.26    | 0.00  | 0.01 | 0.01 | 95% | 95%    |
| 0.8      | 0.35    | 0.00  | 0.03 | 0.03 | 95% | 95%    | 0.8      | 0.26    | -0.00 | 0.02 | 0.02 | 95% | 95%    |
| 0.9      | 0.34    | -0.00 | 0.05 | 0.05 | 95% | 95%    | 0.9      | 0.26    | -0.00 | 0.02 | 0.02 | 95% | 95%    |

**Web Table 25**

*Parameter estimates and estimated standard errors (SE)  
for treatment and censoring model*

| Treatment model  |          |       |
|------------------|----------|-------|
|                  | Estimate | SE    |
| Intercept        | 0.28     | 0.075 |
| Age              | -0.06    | 0.004 |
| Distance         | -0.09    | 0.069 |
| Squared Age      | 0.03     | 0.002 |
| Squared Distance | 0.08     | 0.015 |
| Censoring model  |          |       |
|                  | Estimate | SE    |
| $\theta_r$       | 0.159    | 0.025 |
| $\theta_h$       | 0.039    | 0.001 |
| Age              | 0.015    | 0.009 |

## Web Figure 1

Generating distributions of random effect  $b_i$  in simulation studies corresponding to Table 1 (correct specification) and Web Tables 15–22 (mis-specification).

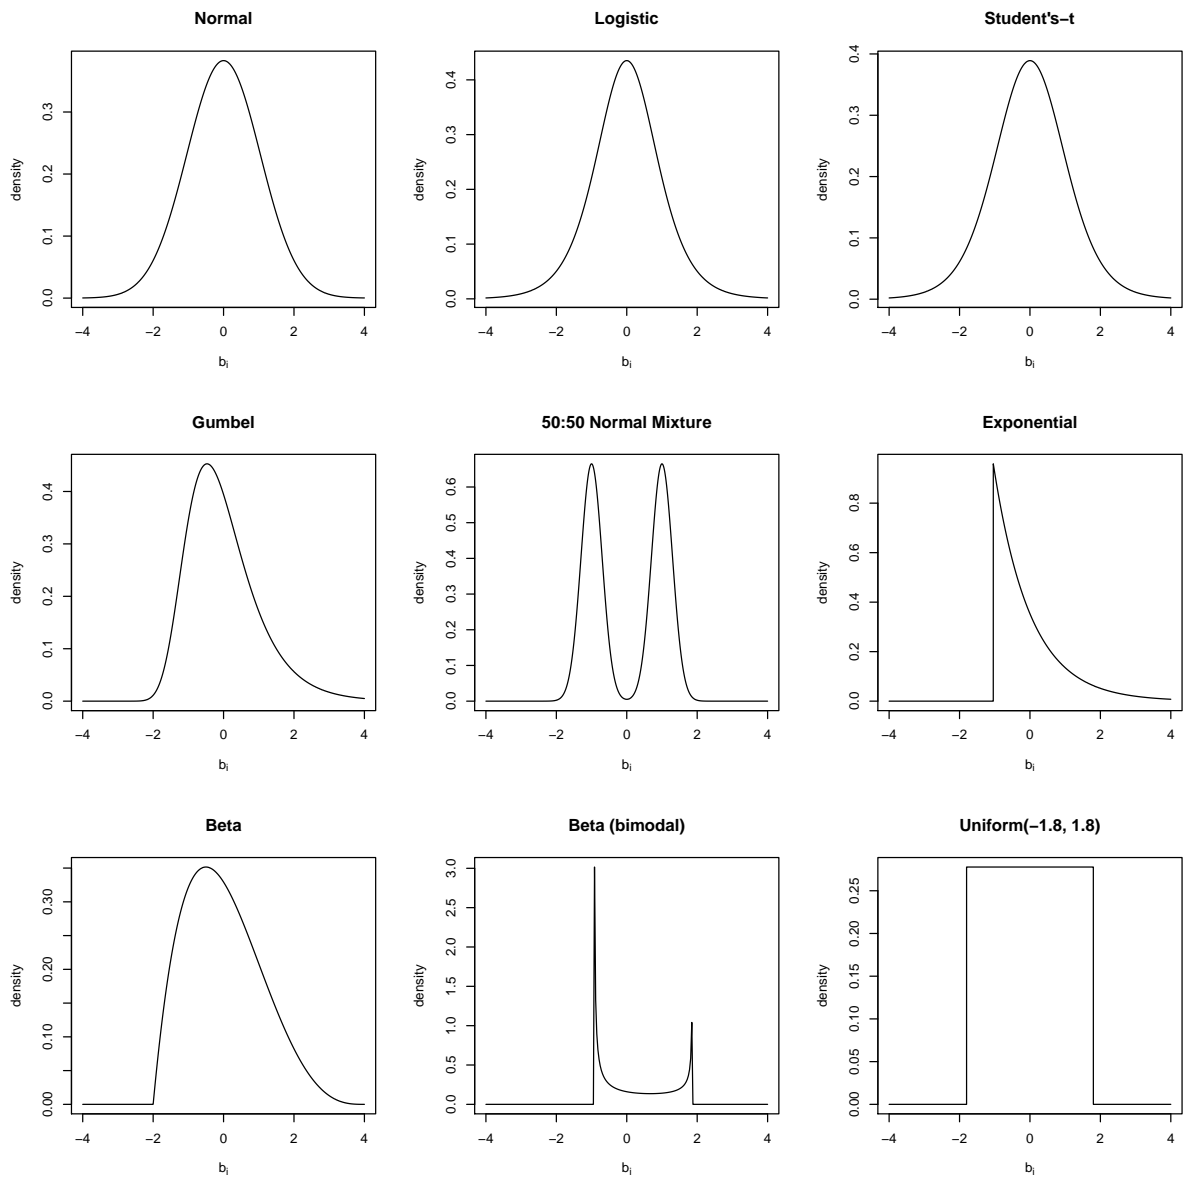

### Web Figure 2

Histograms of weights  $w_{ij} = \pi(\mathbf{A}_{i,-j}; \alpha) / \{\Pr(\mathbf{A}_i | \mathbf{L}_i, \hat{\boldsymbol{\beta}}) S_C(X_{ij} | \mathbf{L}_i, \hat{\boldsymbol{\gamma}})\}$  for  $\alpha = 0.30$  (left),  $\alpha = 0.45$  (center) and  $\alpha = 0.60$  (right)

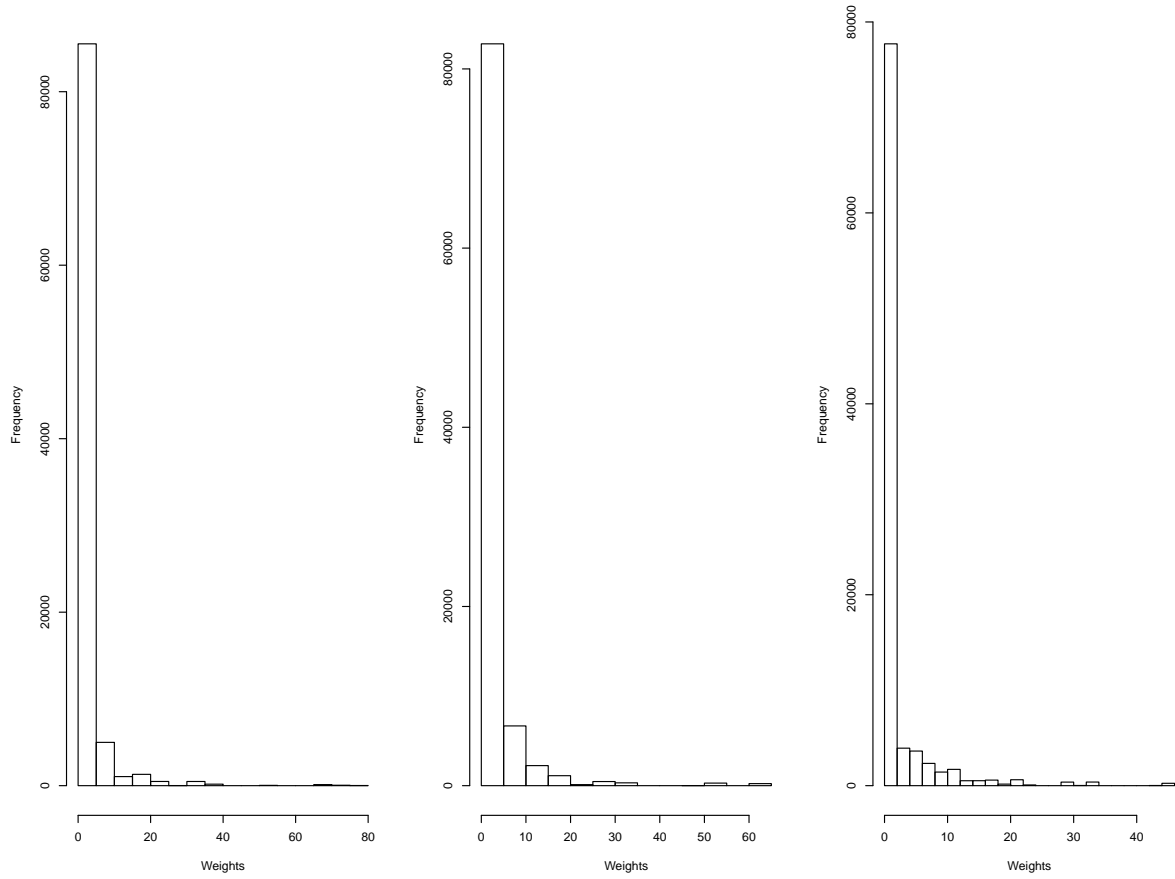

### Web Figure 3

Histograms of weights  $\tilde{w}_{ij} = \pi(\mathbf{A}_i; \alpha) / \{\Pr(\mathbf{A}_i | \mathbf{L}_i, \hat{\beta}) S_C(X_{ij} | \mathbf{L}_i, \hat{\gamma})\}$  for  $\alpha = 0.30$  (left),  $\alpha = 0.45$  (center) and  $\alpha = 0.60$  (right)

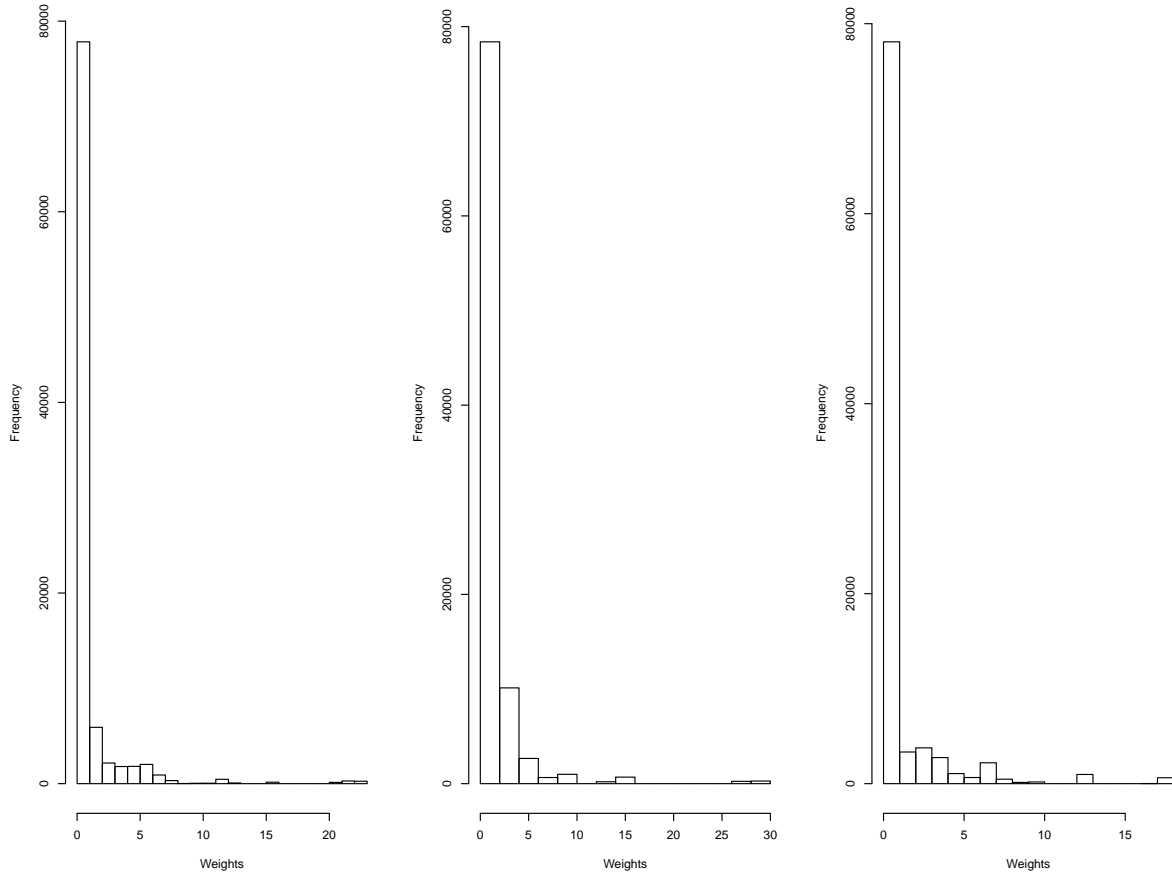

Supplement: NIHMS1683702-supplement-supp-final.pdf [file NIHMS1683702-supplement-supp-final.pdf]
